# Supplementary material
Source: Springer Nature journal article supplement (https://www.springermedizin.de/resource/supplementary/12936_2012_2561_MOESM6_ESM.pdf/9543182)

**A****All predicted proteins**

28874

**Singletons**

2422

**Orthologous groups**

5127

■ **Single proteins per species**

4319

■ **Multiple proteins per species**

808

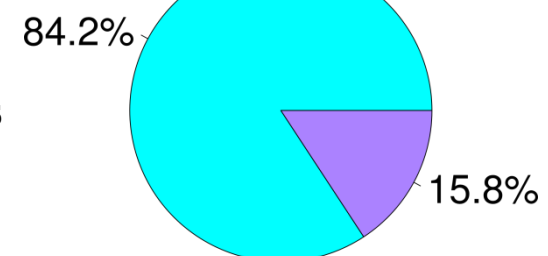**B**■ **Positive**

398

■ **Mixed**

541

■ **Negative**

3380

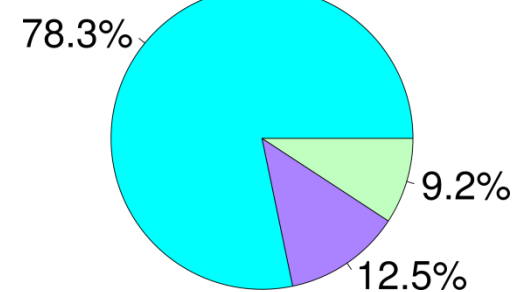**C**■ **No misannotations**

111

**Containing putative misannotations**

413 (561)

■ **Inconclusive**

17

■ **Reannotated**

331 (446)

■ **Partially reannotated**

82 (115)

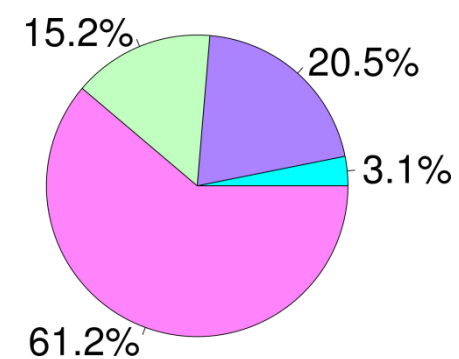**D**■ **85 [108]****Still Mixed**

289

[20] {77} 76

■ **68 [99]****Reclassified as Negative**

74

[12] {6} 6

■ **178 [239]****Reclassified as Positive**

178

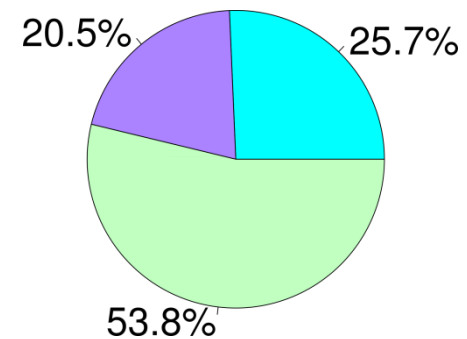

Supplement: MOESM6 [file 9543182]
